# Supplementary material for: Complexation thermodynamics of lanthanides with 2-thenoyltrifluoroacetone in a room temperature ionic liquid. Part-II: calorimetry and MD simulation studies
Source: Royal Society of Chemistry journal article supplement (doi:10.1039/d2nj05314d), 2022-11-30
Supplement: d2nj05314d1.pdf [file d2nj05314d1.pdf]

## ELECTRONIC SUPPORTING INFORMATION

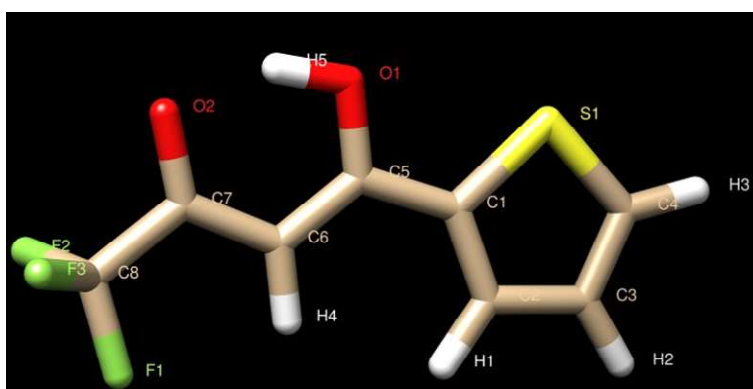

**Figure S1.** Schematic representation of TTA molecule with atoms

**Table S1.** Bonded force-field parameters

| Molecules | Bonds(i-j) | $K_r$ (kJmol <sup>-1</sup> nm <sup>-1</sup> ) | $r_{eq}$ (nm) |
|-----------|------------|-----------------------------------------------|---------------|
| Tta-enol  | S-C        | 104600                                        | 0.174         |
|           | C1-C5      | 132632.8                                      | 0.145         |
|           | C1-C2      | 178656.8                                      | 0.138         |
|           | C2-C3      | 229701.6                                      | 0.141         |
|           | C6-C7      | 171544                                        | 0.141         |
|           | C5-O1      | 133888                                        | 0.132         |
|           | C7-O2      | 238488                                        | 0.124         |
|           | C-F        | 153552.8                                      | 0.135         |
|           | C-H        | 142256                                        | 0.108         |
|           | O-H        | 231375.2                                      | 0.101         |

  

| Molecules | Angles(i-j-k) | $K_\theta$ (kJmol <sup>-1</sup> rad <sup>-2</sup> ) | $\theta_{eq}$ (degree) |
|-----------|---------------|-----------------------------------------------------|------------------------|
| Tta-enol  | S-C-C         | 100.00                                              | 112.49                 |
|           | S-C-H         | 209.20                                              | 119.68                 |
|           | C-S-C         | 259.40                                              | 90.88                  |
|           | C1-C5-O1      | 209.20                                              | 115.00                 |
|           | C1-C5-C6      | 167.36                                              | 124.01                 |
|           | C1-C2-H1      | 146.44                                              | 123.21                 |
|           | C1-C2-C3      | 355.64                                              | 113.21                 |
|           | C2-C1-C5      | 292.88                                              | 129.01                 |
|           | C5-O1-H5      | 230.12                                              | 107.00                 |
|           | C6-C7-O2      | 334.72                                              | 125.11                 |
|           | C-C-F         | 209.20                                              | 110.75                 |
|           | F-C-F         | 322.16                                              | 107.66                 |

**Table S2.** Non bonded force-field parameters

| molecules | site | $\sigma$ (nm) | $\epsilon$ (kJ/mol) |
|-----------|------|---------------|---------------------|
| tta       |      |               |                     |
|           | S    | 0.360         | 1.485               |
|           | C1   | 0.355         | 0.292               |
|           | C2   | 0.355         | 0.317               |
|           | C5   | 0.350         | 0.276               |
|           | C7   | 0.375         | 0.439               |
|           | O1   | 0.312         | 0.711               |
|           | O2   | 0.296         | 0.878               |
|           | H1   | 0.242         | 0.125               |
|           | H3   | 0.290         | 0.585               |
|           | H5   | 0.250         | 0.125               |
|           | F    | 0.295         | 0.221               |
|           | Eu   | 0.327         | 0.322               |

**Table S3.** Partial atomic charges on HTTA (*enol* and *enolate* forms) using Mullien atomic population analysis method.

| Atom | <i>enol</i> | <i>enolate</i> |
|------|-------------|----------------|
| S    | 0.21279     | 0.14456        |
| O1   | -0.24717    | -0.36885       |
| O2   | -0.34943    | -0.33616       |
| C1   | -0.39011    | -0.32152       |
| C2   | 0.02586     | 0.03161        |
| C3   | -0.17071    | -0.19762       |
| C4   | -0.16977    | -0.19944       |
| C5   | 0.27010     | 0.20764        |
| C6   | -0.18651    | -0.27468       |
| C7   | 0.10176     | 0.05297        |
| C8   | 0.44059     | 0.36732        |
| F    | -0.15575    | -0.18935       |
| Ha   | 0.15068     | 0.1085         |
| Hb   | 0.17535     | 0.13650        |
